# Supplementary material
Source: publisher site journal article supplement (https://www.dovepress.com/article/410372)

**Supplementary Table. Survival according to combination of GOLD stages and GOLD 2023 groups.**

| **GOLD (1–4) & GOLD 2023 (A–E)** | **Overall survival** | | |
| --- | --- | --- | --- |
| **12-month (95% CI)** | **36-month (95% CI)** | **60-month (95% CI)** |
| **2A** | 89% (79%-100%) | 86% (75%-98%) | 79% (66%-94%) |
| **2B** | 93% (89%-97%) | 79% (72%-86%) | 64% (56%-73%) |
| **2E** | 91% (85%-98%) | 77% (69%-88%) | 61% (50%-74%) |
| **3A** | 96% (89%-100%) | 84% (70%-100%) | 71% (55%-92%) |
| **3B** | 91% (87%-95%) | 72% (66%-79%) | 54% (47%-62%) |
| **3E** | 84% (78%-90%) | 61% (53%-70%) | 40% (32%-50%) |
| **4A** | 100% (100%) | 100% (100%) | 100% (100%) |
| **4B** | 83% (71%-96%) | 53% (39%-73%) | 32% (19%-54%) |
| **4E** | 80% (71%-91%) | 53% (41%-68%) | 40% (29%-56%) |

**Legend**

**GOLD** = Global Initiative for Chronic Obstructive Lung Disease; **CI** = confidence interval

**Supplementary Figure. Survival probability according to combination of GOLD stages and GOLD 2023 groups.**


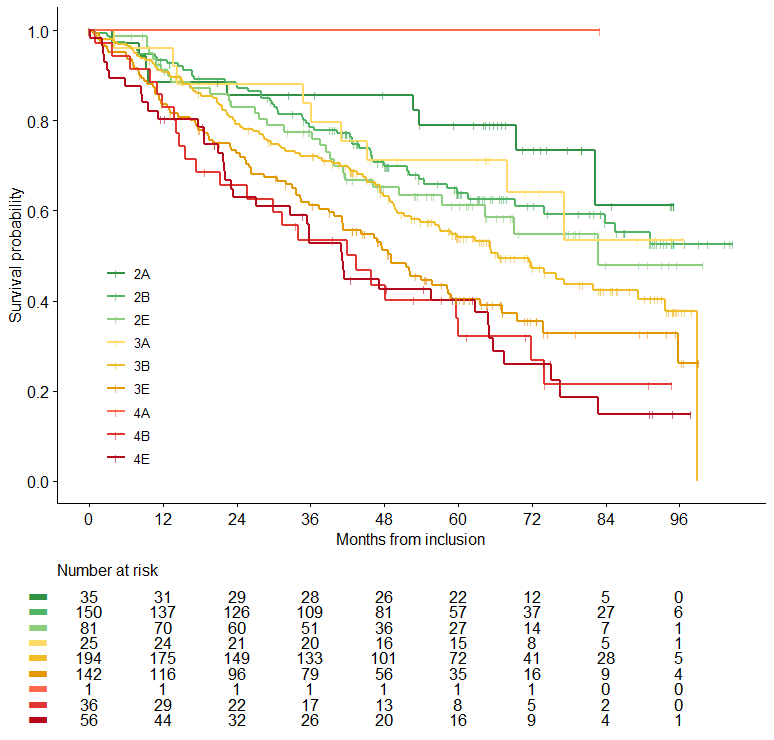

Supplement: Supplementary file 1 [file get_supplementary_file.php]
